# Supplementary material for: Palladium supported on amino functionalized magnetic MCM-41 for catalytic hydrogenation of aqueous bromate
Source: Royal Society of Chemistry journal article supplement (doi:10.1039/c4ra05593d), 2014-01-01

**Supporting information**

For

**Palladium supported on amino functionalized magnetic MCM-41 for catalytic  
hydrogenation of aqueous bromate**

Huan Chen <sup>a</sup>, Peng Zhang <sup>a</sup>, Wenhui Tan <sup>a</sup>, Fang Jiang <sup>a\*</sup>, Rong Tang <sup>b</sup>

<sup>a</sup> *School of Environmental & Biological Engineering, Nanjing University of Science  
and Technology, Nanjing 210094, PR China*

<sup>b</sup> *Jiangsu Open University, Nanjing 210036, PR China*

Fig. 1S. Catalytic bromate reduction over DP-2 catalyst. Reaction condition: initial bromate concentration 0.78 mM, catalyst dosage 0.05 g L<sup>-1</sup>, pH=5.6.

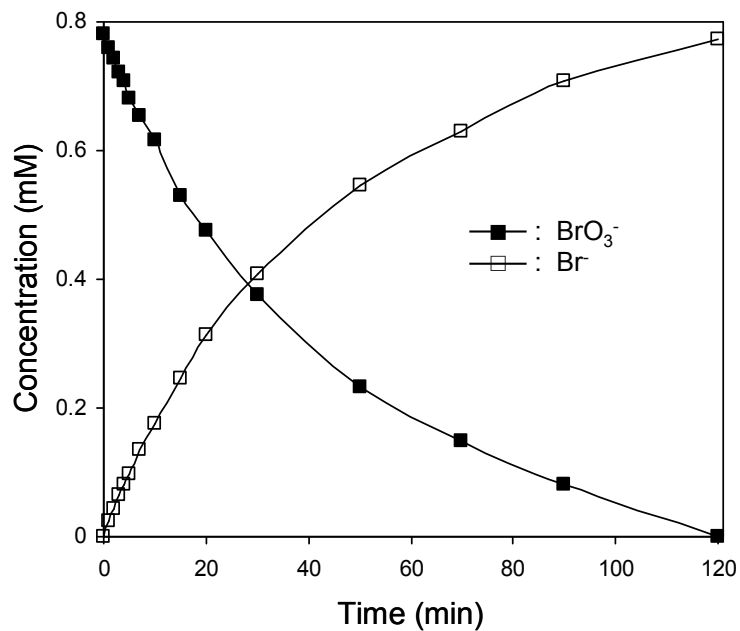

Fig. 2S. Initial activity of DP-2 as a function of (a) catalyst dosage and (b) stirring rate.

Reaction condition: initial bromate concentration 0.78 mM, pH=5.6.

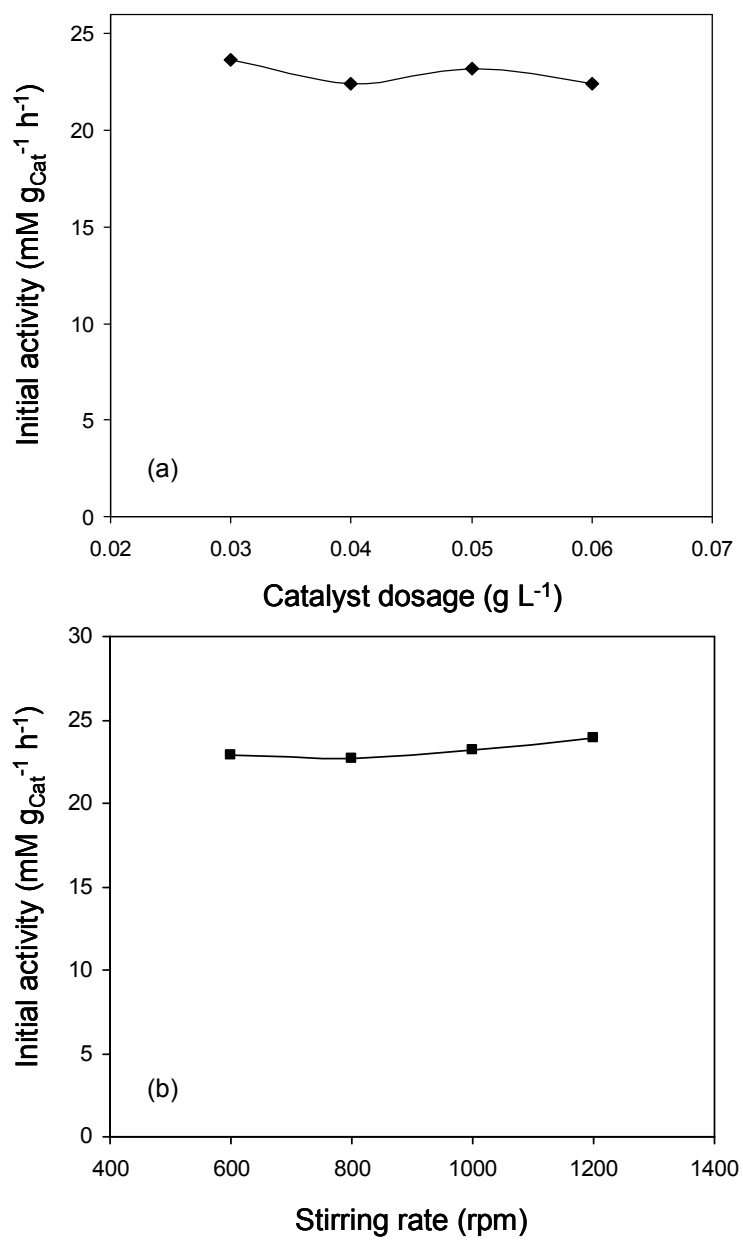

Fig. 3S. Wide-angle XRD patterns of (a) DP-1, DP-3, DP-4, DP-5 and (b) IMP-1, IMP-3, IMP-4, IMP-5.

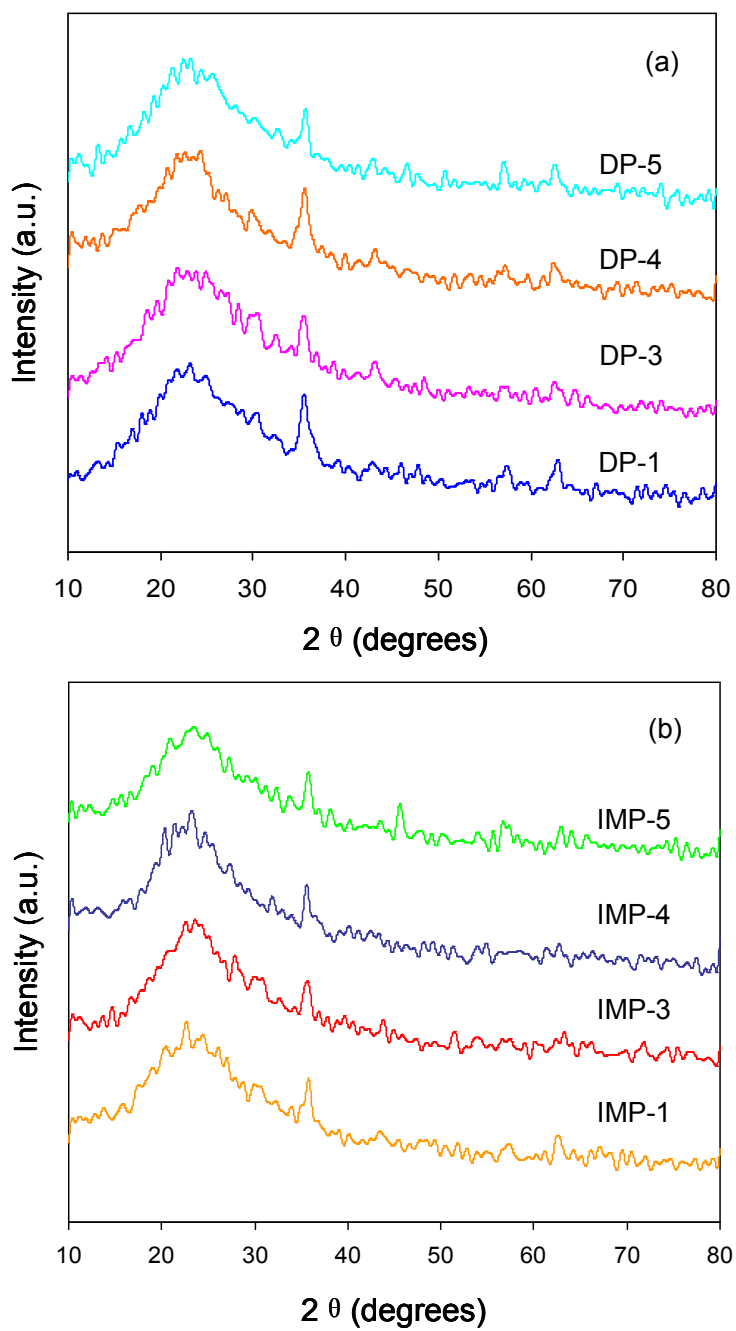

Fig. 4S. XPS spectra of N 1s and Pd 3d for DP-1, DP-2, DP-3, DP-4 and DP-5 catalysts.

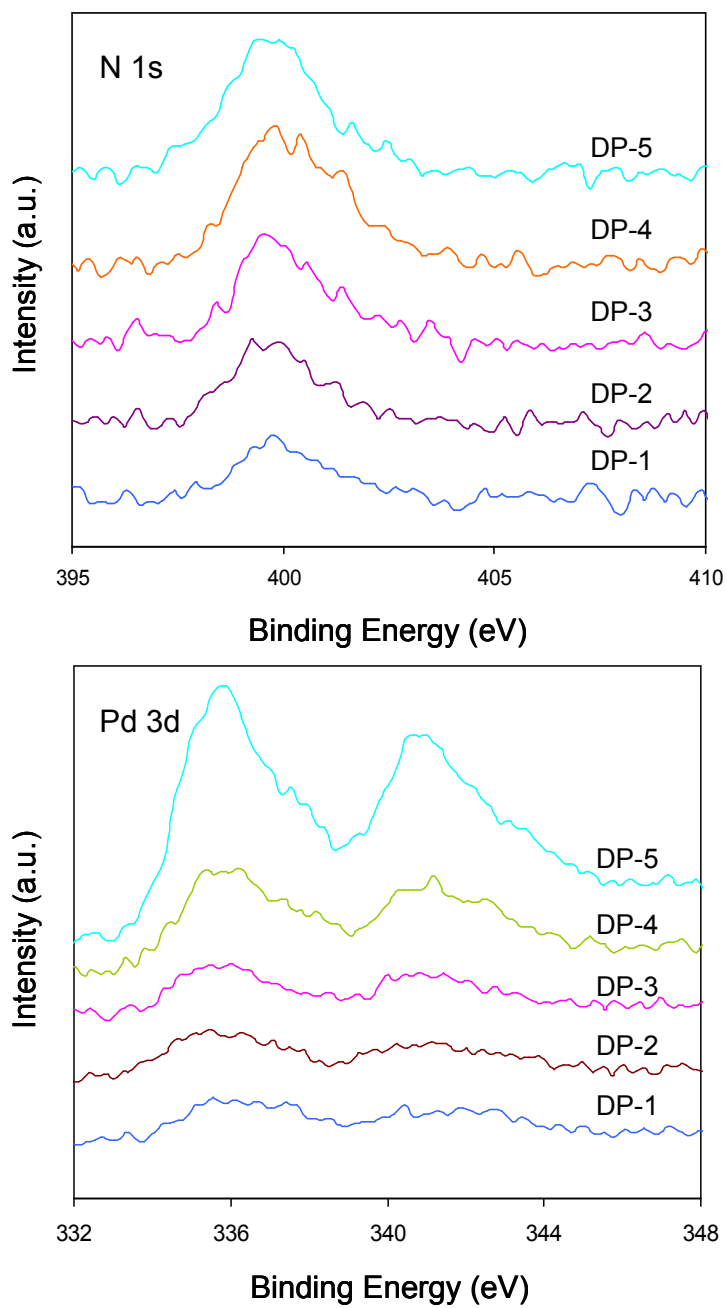

Fig. 5S. Initial catalytic activity of DP-0, DP-1, DP-2, DP-3, DP-4, DP-5 in the first and fifth runs.

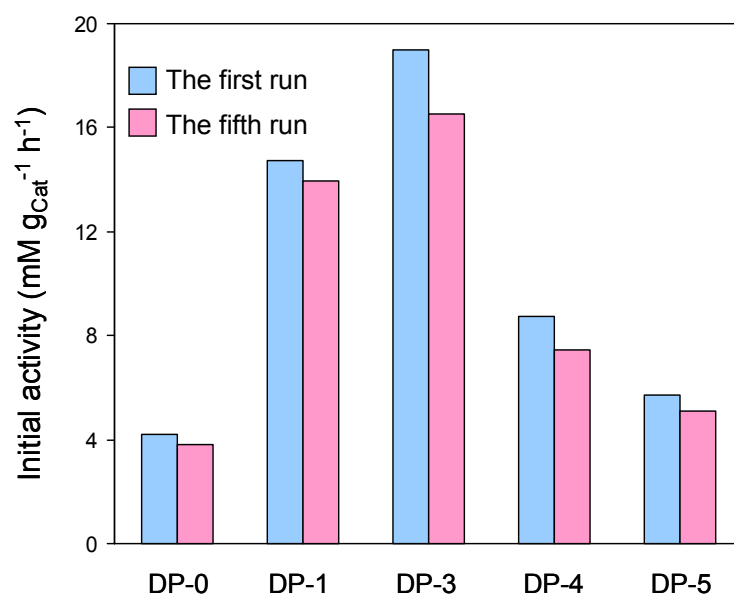

Supplement: c4ra05593d1.pdf [file c4ra05593d1.pdf]
